# Supplementary material for: Monoglyceride lipase deficiency affects hepatic cholesterol metabolism and lipid-dependent gut transit in ApoE−/− mice
Source: PubMed Central journal article supplement (PMC5464855; doi:10.18632/oncotarget.16529), 2017-03-23
Supplement: oncotarget-08-33122-s001.pdf [file oncotarget-08-33122-s001.pdf]

## Monoglyceride lipase deficiency affects hepatic cholesterol metabolism and lipid-dependent gut transit in ApoE<sup>-/-</sup> mice

### Supplementary Materials

#### Primer sequences used for qPCR

Abcg1-fwd:  
5'-GACGCTGACTATAAGAGAGACC-3',  
Abcg1-rev:  
5'-GGAGTTGCTCAGGACCTTCTTG-3';  
Abcb1a-fwd:  
5'-AATGTTTCGTTATGCAGGTTGGC-3',  
Abcb1a-rev:  
5'-TGGCTCTTTTATCGGCCTCAC-3';  
Abcg5-fwd:  
5'-AGAGGGCCTCATCAACAGA-3',  
Abcg5-rev:  
5'-CTGACGCTGTAGGACACATGC-3';  
Abcg8-fwd:  
5'-CTGTGGAATGGGACTGTACTTC-3',  
Abcg8-rev:  
5'-GTTGGACTGACCACTGTAGGT-3';  
Acat2-fwd: 5'-GATGGTCTGACAGATGCCTT-3',  
Acat2-rev: 5'-AGCACTGGCACAATCTCTT-3';  
Acc1-fwd:  
5'-GGACTTGGAGCAGAGAACCTTCG-3',  
Acc1-rev:  
5'-CAAGCTGGTTGTTGGAGGTGTA-3';  
Acc2-fwd:  
5'-CGCTCACCAACAGTAAGGTGG-3',  
Acc2-rev: 5'-GCTTGGCAGGGAGTTCCTC-3';  
Asbt-fwd: 5'-GTACAATGGTGGAGCACAGC-3',  
Asbt-rev: 5'-GTGCCTGGATCATTGAACCC-3';  
Bsep-fwd:  
5'-GAACATGACAAACGGAACAAGC-3',  
Bsep-rev: 5'-CCCAGTGATTACCCACAACCTT-3';  
Cb1r-fwd: 5'-AAGTCGATCTTAGACGGCCTT-3',  
Cb1r-rev:  
5'-TCCTAATTTGGATGCCATGTCTC-3';  
Cb2r-fwd: 5'-ACGGTGGCTTGGAGTTCAAC-3',  
Cb2r-rev: 5'-GCCGGGAGGACAGGATAAT-3';  
Cd36-fwd: 5'-GCAGGTCTATCTACGCTGTG-3',  
Cd36-rev: 5'-GGTTGTCTGGATTCTGGAGG-3';  
Cpt1a-fwd: 5'-CTCCGCCTGAGCCATGAAG-3',  
Cpt1a-rev: 5'-CACCAGTGATGATGCCATTCT-3';  
Cyclophilin A-fwd:  
5'-GAGCTGTTTGCAGACAAAGTTC-3',  
Cyclophilin A-rev:  
5'-CCCTGGCACATGAATCCTGG-3';  
Cyp7a1-fwd:  
5'-GGGCATCTCAAGCAAACACCATTC-3',  
Cyp7a1-rev:  
5'-CGGGACTGATCTAGAGGGGGACAC-3';  
Cyp8b1-fwd:  
5'-CCTCTGGACAAGGGTTTTGTG-3',  
Cyp8b1-rev: 5'-GCACCGTGAAGACATCCCC-3';  
Cyp27a1-fwd:  
5'-CTTCATCGCACAAGGAGAGC-3',  
Cyp27a1-rev:  
5'-ATGGCTTCCAAGGCAAGGTG-3';  
Dgat1-fwd: 5'-TCCGCCTCTGGGCATTC-3',  
Dgat1-rev: 5'-GAATCGGCCCAATCCA-3';  
Dgat2-fwd:  
5'-AGTGGCAATGCTATCATCATCGT-3',  
Dgat2-rev:  
5'-TCTTCTGGACCCATCGGCCCCAGGA-3';  
Fabp1-fwd:  
5'-ATGAACTTCTCCGGCAAGTACC-3',  
Fabp1-rev: 5'-GGTCCTCGGGCAGACCTAT-3';  
Fas-fwd:  
5'-GAAGCCGAACACCTCTGTGCAGT-3',  
Fas-rev: 5'-CTCCTTGCTGCCATCTGTATTG-3';  
HmgCoAr-fwd:  
5'-CTATTGCACCGACAAGAAGCCT-3',  
HmgCoAr-rev:  
5'-GCCATCACAGTGCCACATACAA-3';  
Ldlr-fwd: 5'-CATGTCTGTCACTGTGTCAGTCC-3',  
Ldlr-rev: 5'-CTTGTCCAAGCTGATGCACTCC-3';  
Lrp1-fwd:  
5'-ACTATGGATGCCCTAAAACCTTG-3',  
Lrp1-rev: 5'-GCAATCTCTTTCACCGTCACA-3';  
Mttp-fwd: 5'-GTCAACAGAGAGGGCAGAGAAG-3',  
Mttp-rev: 5'-CTAGCCAAGCCTCTCTTGAG-3';  
Npc1l1-fwd:

5'-TGTCCTCCGCCTTATACAATGG-3',

Npc1l1-rev:

5'-CCTTGGTGATAGACAGGCTACTG-3';

Osta-fwd: 5'-CCGCAGCCCAGCTCCTGAG-3',

Osta-rev:

5'-TGCAGAGCTACTCCAGATCAGA-3';

Ost $\beta$ -fwd: 5'-GTCCAGGGCCAGAAACATCTC-3',

Ost $\beta$ -rev: 5'-TCCTTCTCAGGAGGAACATGCT-3';

Scd1-fwd:

5'-TTCTTGCATACACTCTGGTGC-3',

Scd1-rev: 5'-CGGGATTGAATGTTCTTGTTCGT-3';

Srb1-fwd:

5'-TTTGGAGTGGTAGTAAAAAGGGC-3',

Srb1-rev:

5'-TGACATCAGGGACTCAGAGTAG-3';

Srebp1-fwd:

5'-CCATCGACTACATCCGCTTCTT-3',

Srebp1-rev:

5'-ACTTCGTAGGGTCAGGTTCTC-3';

Srebp2-fwd:

5'-AAGTCCTGCAGCCTCAAGTG-3',

Srebp2-rev: 5'-CTGCCATCTGTCTTCAGCGT-3'.

ApoE<sup>-/-</sup>

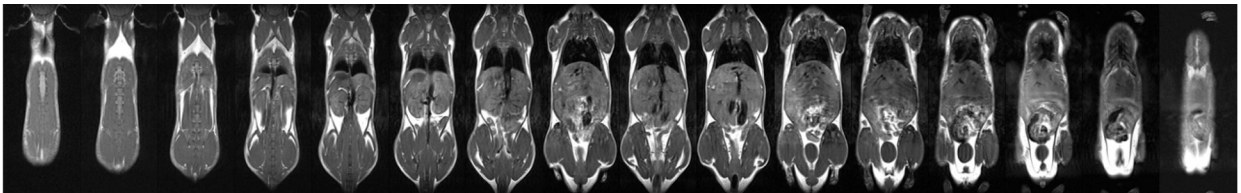

DKO

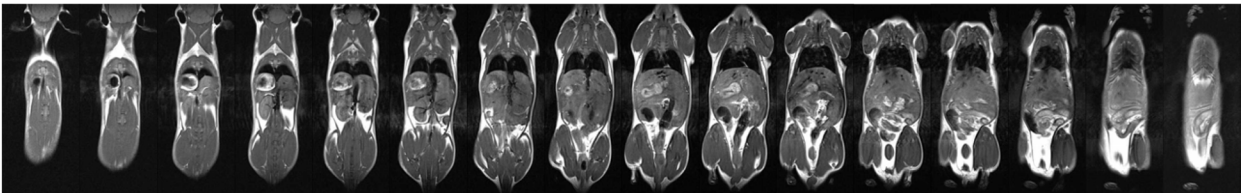

**Supplementary Figure 1: Unchanged body fat in DKO mice.** Representative images of cross-sectional MRI scan of female ApoE<sup>-/-</sup> and DKO mice after 9 weeks of WTD feeding. Bright areas represent adipose tissue.

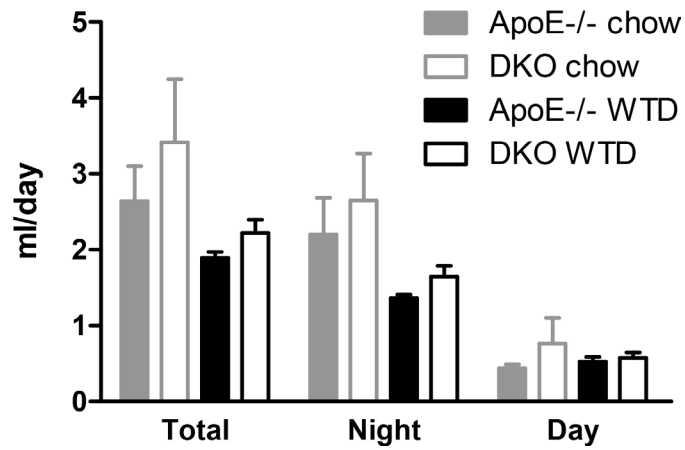

**Supplementary Figure 2: Comparable water consumption in ApoE<sup>-/-</sup> and DKO mice.** Water consumption of mice on chow and WTD was monitored by automated sensors in TSE Phenomaster during three consecutive days ( $n = 4-5$ ). Data represent means + SD.

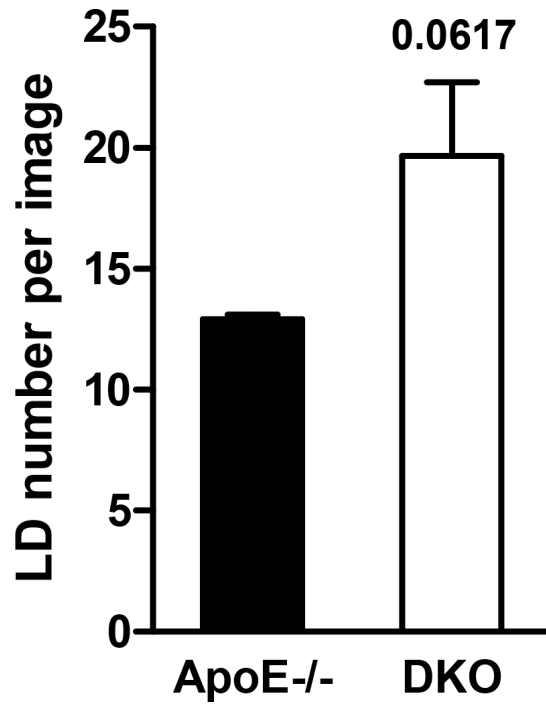

**Supplementary Figure 3: Increased LD counts in livers of DKO mice.** Mice were fed with WTD and fasted for 16 h before liver isolation. The numbers of LDs per image were counted from 94 electron micrographs and total surface of 30,530  $\mu\text{m}^2$  per genotype. Data represent means + SD.
